# Supplementary material for: Deletion ofHerpud1Enhances Heme Oxygenase-1 Expression in a Mouse Model of Parkinson’s Disease
Source: Hindawi journal article supplement (doi:10.1155/2016/6163934), 2016-01-01
Supplement: f1 [file 6163934.f1.pdf]

## Deletion of *Herpud1* enhances heme oxygenase-1 expression in a mouse model of Parkinson's disease

### Supplementary FIGURE LEGENDS

Figure S1. Astroglial activation in the CPu and HO-1 expression in the SNpc.

*Herpud1*<sup>+/+</sup> and *Herpud1*<sup>-/-</sup> mice were injected with MPTP and perfused with 4% paraformaldehyde at the indicated times. Brain sections, including sections with the CPu (A) or SNpc (B), were subjected to immunohistochemistry with the indicated antibodies. Arrows and arrowheads indicate HO-1 expression in the TH-positive dopaminergic neurons and astrocyte-like cells after MPTP administration, respectively. Scale bars = 150μm (A), 30μm (B).

Figure S2. Gene expression associated with protein degradation after MPTP administration.

*Herpud1*<sup>+/+</sup> and *Herpud1*<sup>-/-</sup> mice were injected with MPTP and protein samples (30 μg) extracted from the CPu were subjected to western blotting with anti- Ub (A), anti-α-synuclein (B) and anti-LC3 (C) antibodies.

A

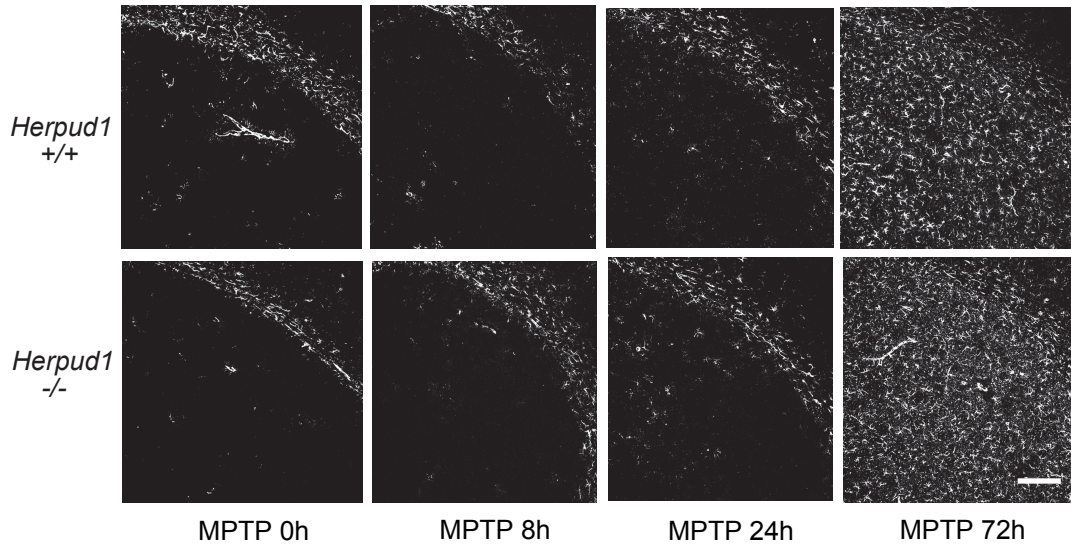

B

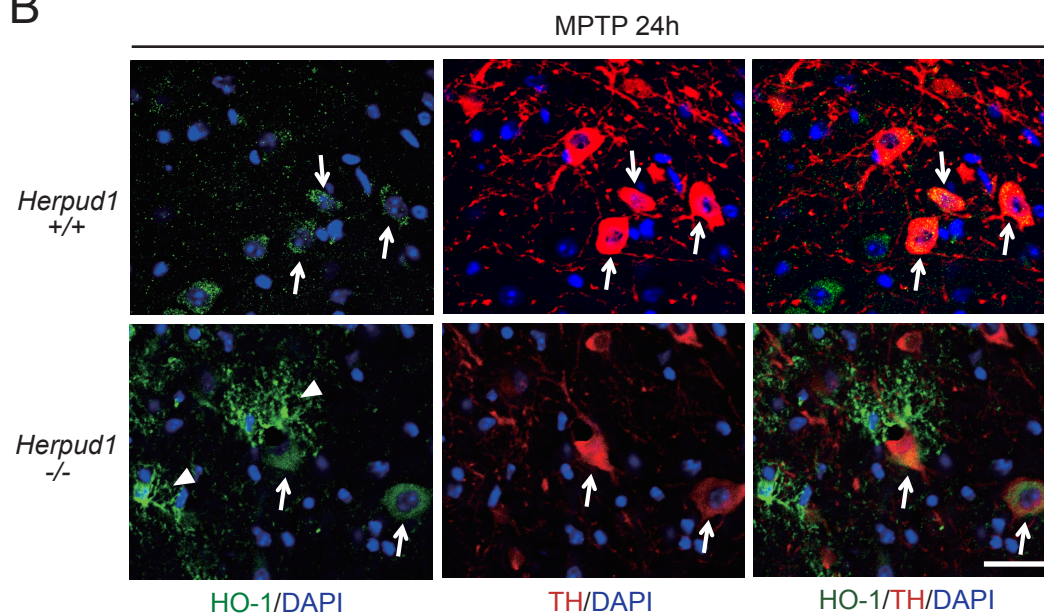

Fig.S1

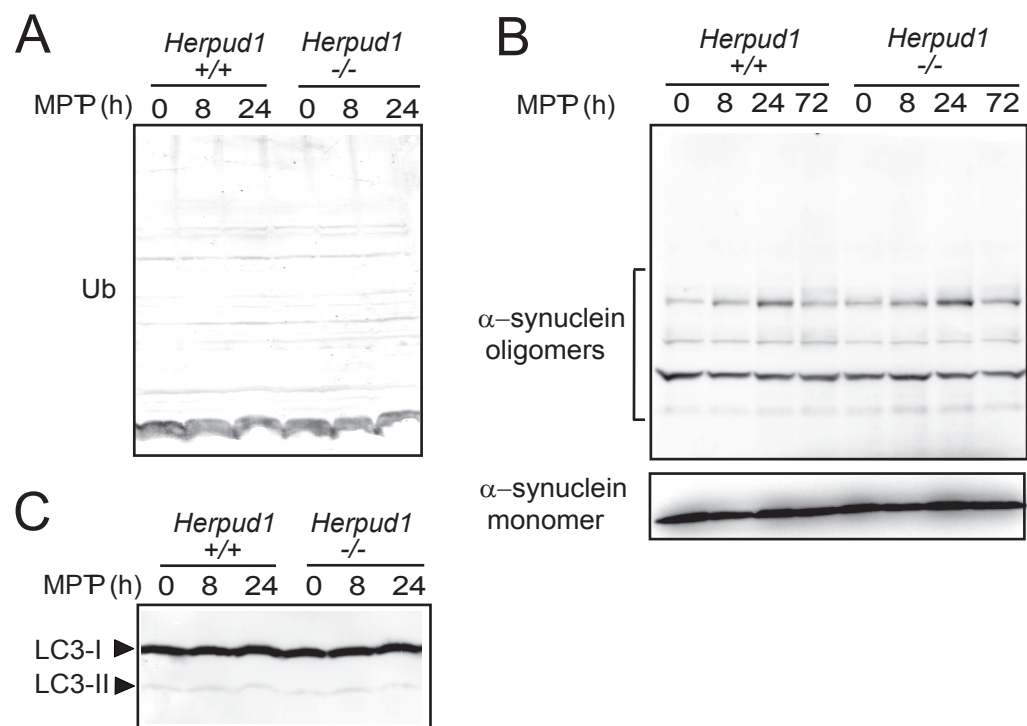

Fig.S2

| <b>Potein</b> | <b>Gene</b>    | <b>Forward</b>           | <b>Reverse</b>           |
|---------------|----------------|--------------------------|--------------------------|
| Herp          | <i>Herpud1</i> | AGAACATCTCtAGGCCTGAG     | TGCCTTGCATAGATCTGCTG     |
| HO-1          | <i>Hmox1</i>   | AGGAGCTGCACCGAAGGGCTG    | TCATCTCCAGAGTGTTTCATGC   |
| Nrf2          | <i>Nfe2l2</i>  | GATCCGCCAGCTACTCCCAGGTTG | CAGGGCAAGCGACTCATGGTCATC |
| GRP78         | <i>Hspa5</i>   | ATGGTATTCTCCGAGTGACA     | ATGGTATTCTCCGAGTGACA     |
| β-actin       | <i>Actb</i>    | TGTGATGGTGGAATGGGTCAGAA  | TGTGGTGCCAGATCTTCTCCATGT |

**Supplemental Table1**
